# Supplementary material for: Self-Assembled BODIPY Derivative with A-D-A Structure as Organic Nanoparticles for Photodynamic/Photothermal Cancer Therapy
Source: Int J Mol Sci. 2022 Nov 21;23(22):14473. doi: 10.3390/ijms232214473 (PMC9698044; doi:10.3390/ijms232214473)
Supplement: Supplementary file 1 [file ijms-23-14473-s001.zip › ijms-1888703-supplementary.pdf]

# Supplementary Information

## Self-assembled BODIPY derivative with A-D-A structure as organic nanoparticles for photodynamic/photothermal cancer therapy

Guojing Li <sup>1</sup>, Mengqian Yang <sup>1</sup>, Qilong Sha <sup>1</sup>, Li Li <sup>1</sup>, Xiaogang Luo <sup>1,3</sup>, Fengshou Wu <sup>1,2\*</sup>

<sup>1</sup> Faculty of Resources and Environmental Engineering, Guizhou Institute of Technology, \linebreak Guiyang 550003, China

<sup>2</sup> State Key Laboratory of Environmental Geochemistry, Institute of Geochemistry, Chinese Academy of Sciences, Guiyang 550081, China.

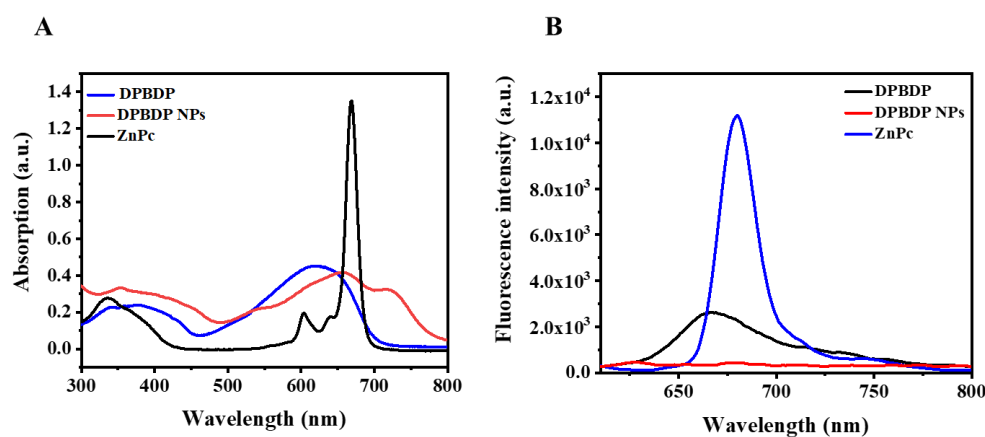

**Figure S1.** (A) Absorption spectrum of DPBDP in THF, DPBDP NPs in deionized water and ZnPc in toluene at the same concentration; (B) The fluorescence spectra of the same concentration of DPBDP, DPBDP NPs, and ZnPc.

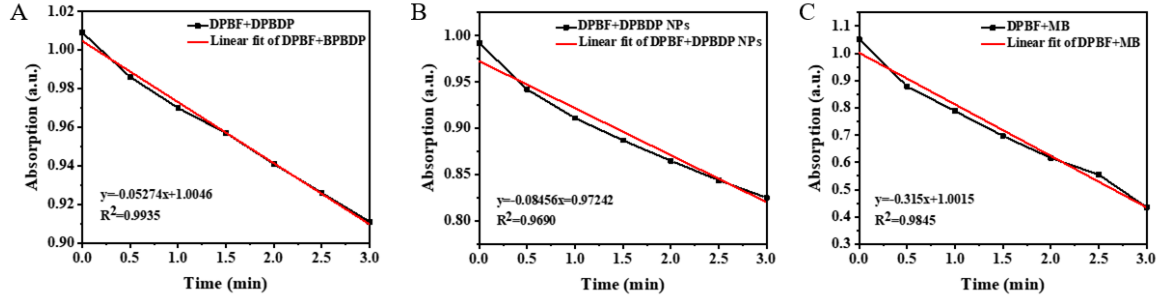

**Figure S2.** The fitting curve of absorbance with time (A) DPBF+DPBDP; (B) DPBF+DPBDP NPs; (C) DPBF+MB

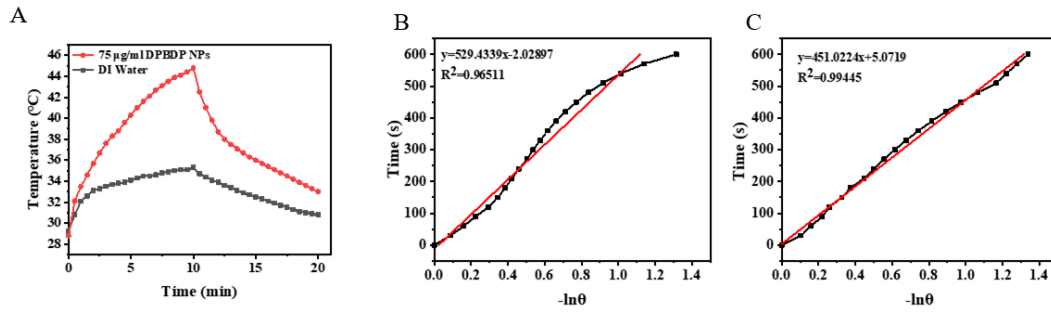

**Figure S3.** (A) Photothermal curves of DPBDP NPs (75 µg/mL) and deionized water under laser irradiation (690 nm, 1.5 W/cm<sup>2</sup>, 10 min) followed by naturally cooling; -lnθ curve fitting of cooling time to temperature driving force in cooling phase of DPBDP NPs (75µg/mL) (B) and DI water (C).

### The calculation of fluorescence quantum yield

The fluorescence quantum yields of DPBDP and DPBDP NPs were calculated using the following equation with zinc phthalocyanine (ZnPc) as a reference.

$$\phi_f = \phi_f^R \frac{I_f}{I_f^R} \frac{A^R}{A} \left( \frac{n}{n^R} \right)^2$$

$\phi_f^R$  is the fluorescence quantum yield of ZnPc (0.30, in toluene); The letters *S* and *R* represent the samples and ZnPc respectively; *A* is the absorbance; *I* is the integrated fluorescence intensity, and the samples and ZnPc were excited at the same wavelength for measuring *I*; *n* is the solvent's refractive index.

### Singlet oxygen detection

The experiments were performed with 50  $\mu\text{M}$  DPBF in MeOH/H<sub>2</sub>O (1:1), followed by the addition of photosensitizer (0.5  $\mu\text{M}$ ). The cuvette was irradiated under 635 nm laser at 0.05 W/cm<sup>2</sup>. The change of absorbance at 414 nm was recorded every 30 seconds. The <sup>1</sup>O<sub>2</sub> yields of DPBDP and DPBDP NPs were calculated by the following equation.

$$\Phi_{\Delta}^S = \Phi_{\Delta}^R \frac{k^S F^R}{k^R F^S}$$

$\Phi_{\Delta}^R$  is the singlet oxygen quantum yield of MB ( $\Phi_{\Delta}^R = 0.52$ ). The letters *S* and *R* represent the samples and MB respectively; *k* is the slope of the curve of DPBF absorbance (414 nm) versus irradiation time. *F* is the absorption correction factor ( $F=1-10^{-OD}$ ). *OD* is the corresponding absorbance of samples at 690 nm.

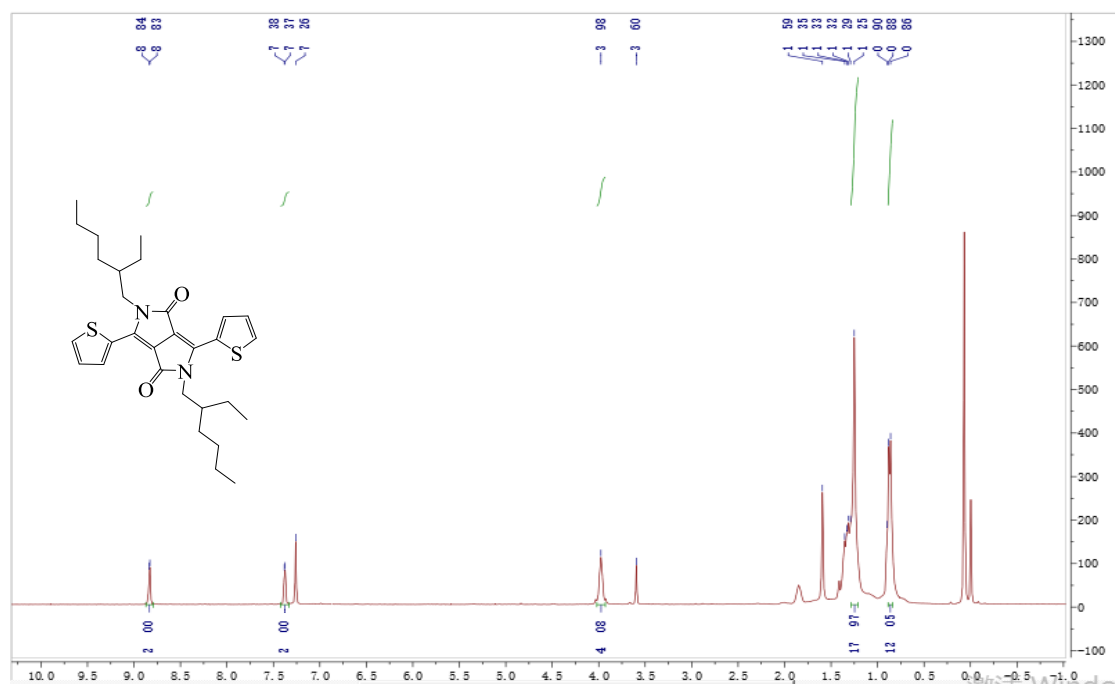

**Figure S4.**  $^1\text{H}$  NMR spectrum of compound 1a

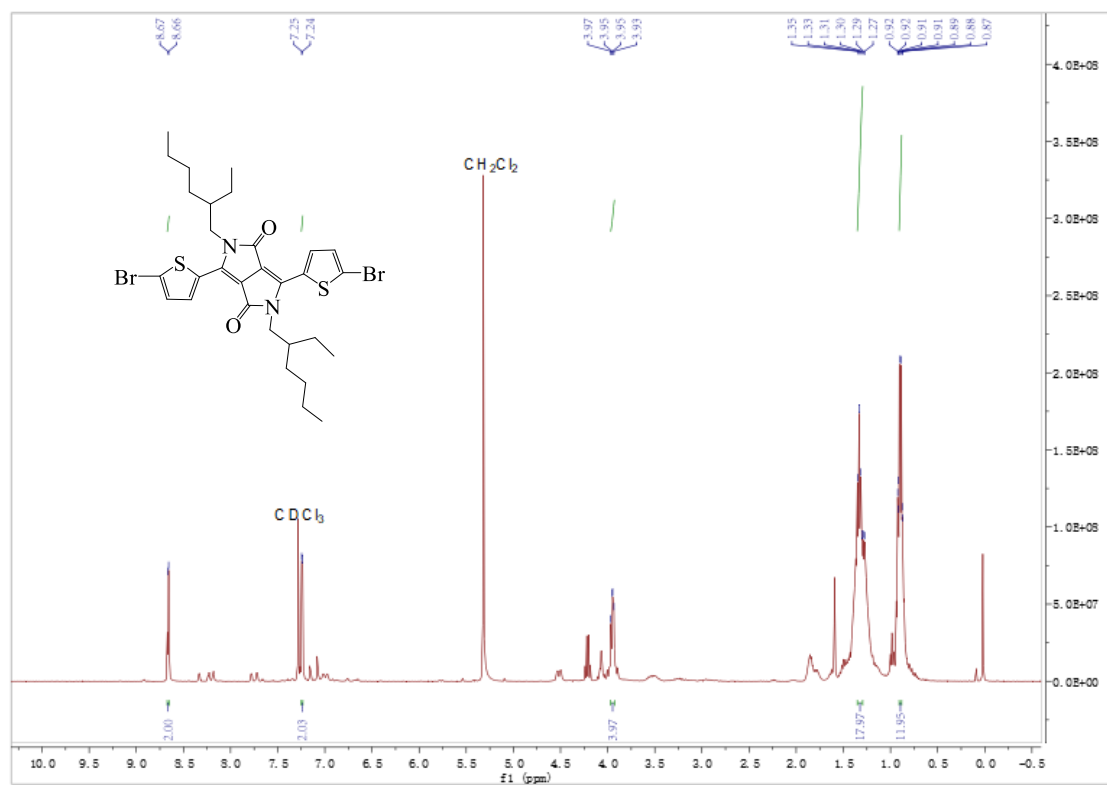

**Figure S5.**  $^1\text{H}$  NMR spectrum of compound 2a

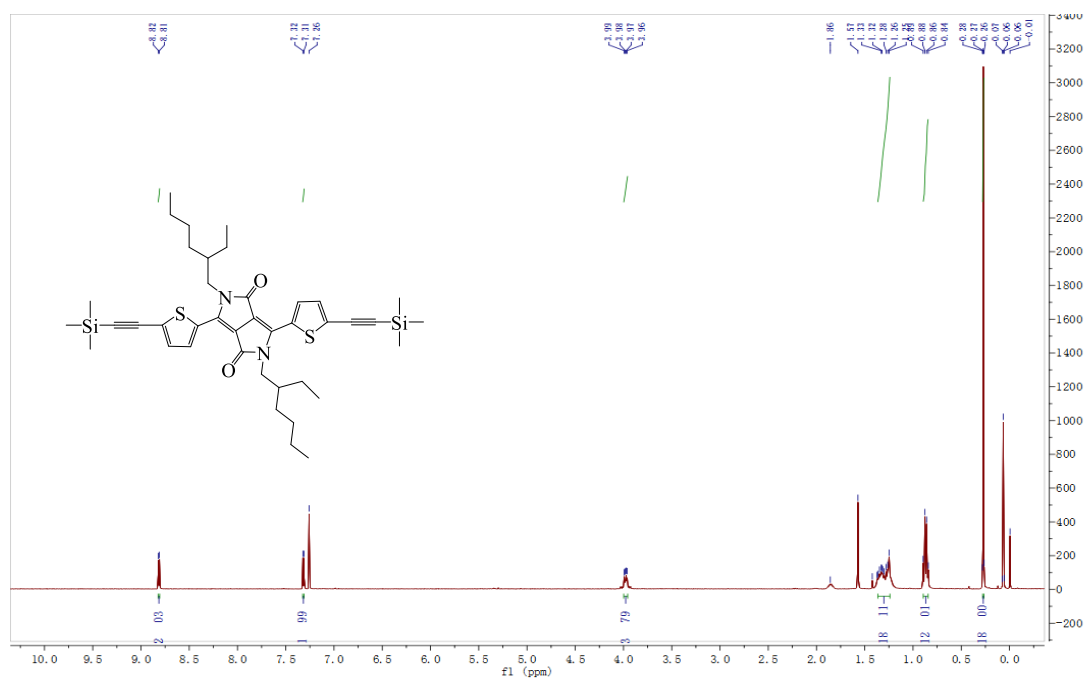

**Figure S6.** <sup>1</sup>H NMR spectrum of compound 3a

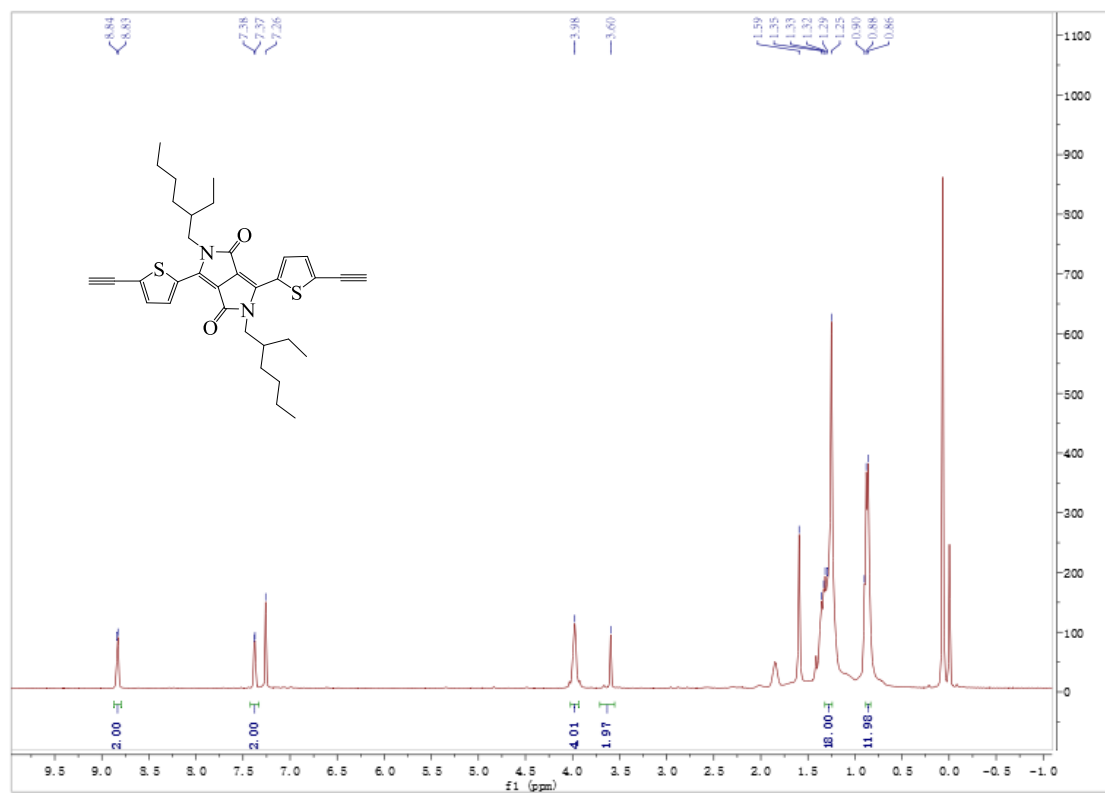

**Figure S7.** <sup>1</sup>H NMR spectrum of compound 4a

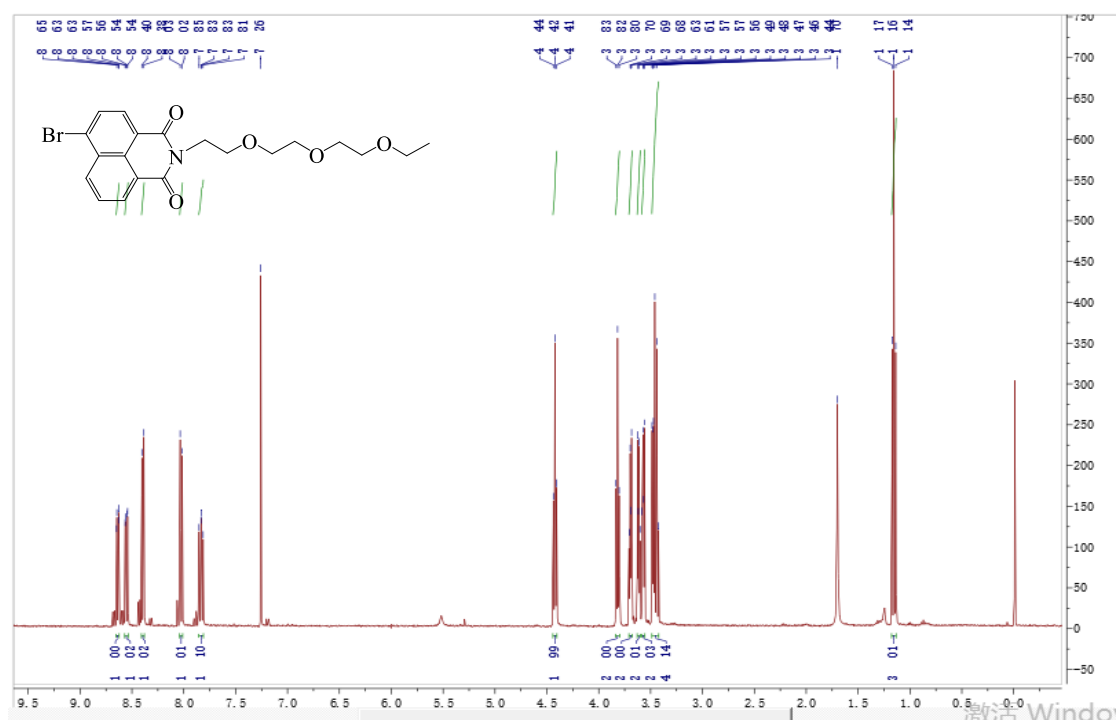

**Figure S8.** <sup>1</sup>H NMR spectrum of compound 4b

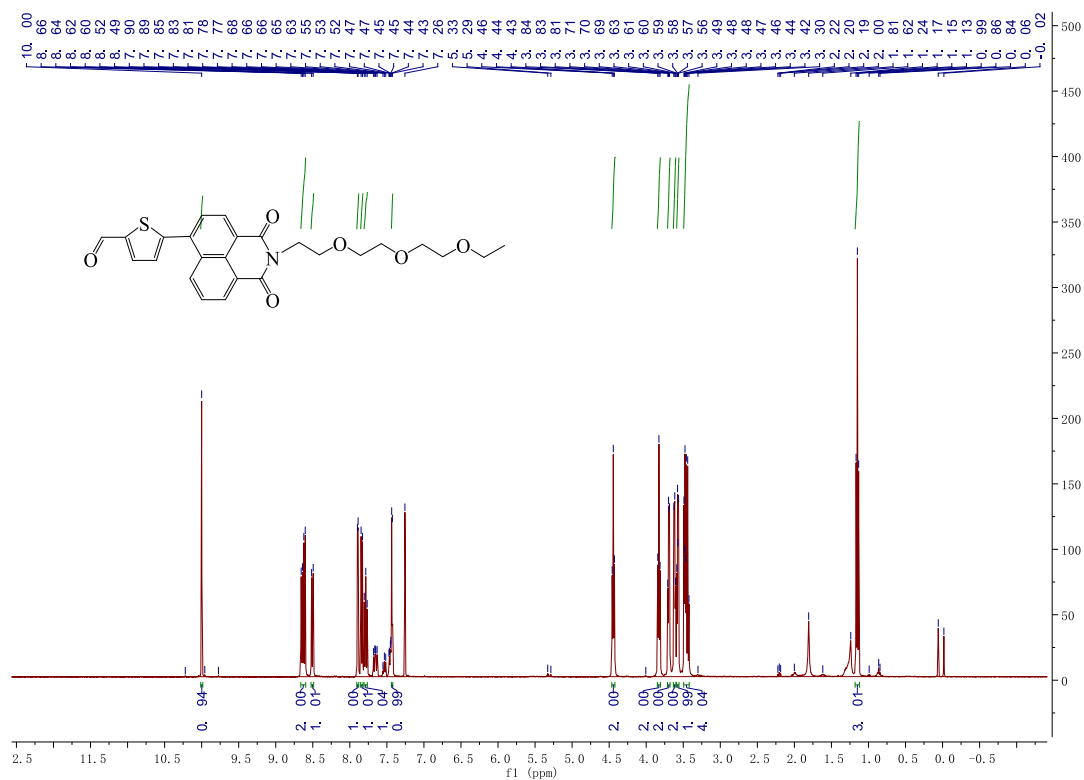

**Figure S9.** <sup>1</sup>H NMR spectrum of compound 5b

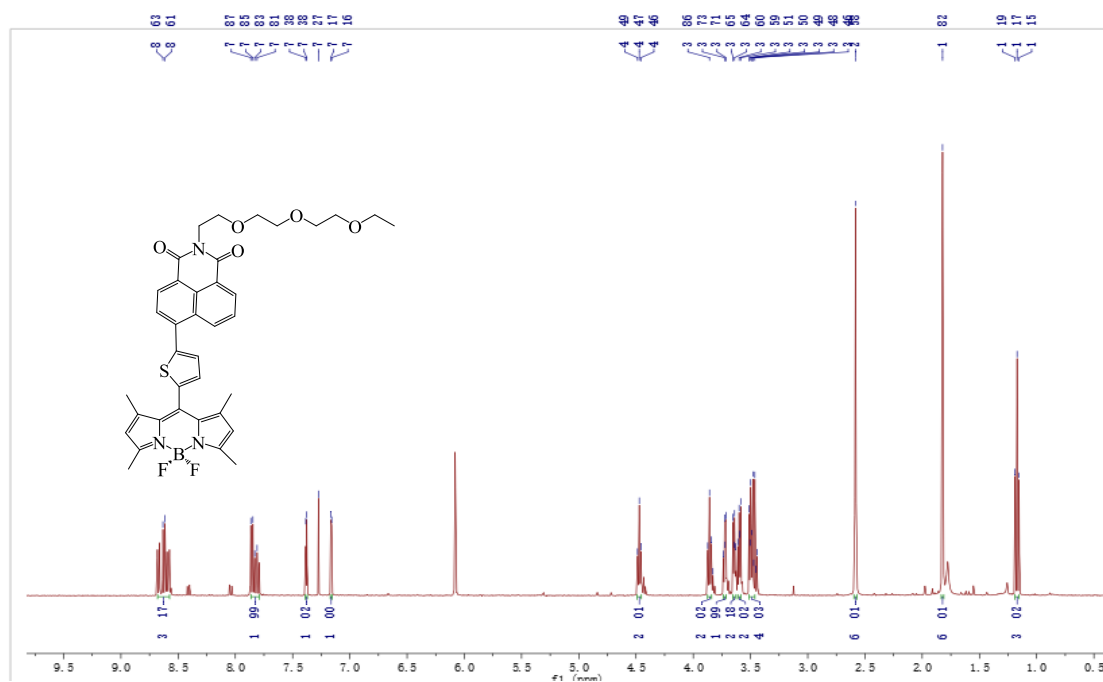

**Figure S10.**  $^1\text{H}$  NMR spectrum of compound 6b

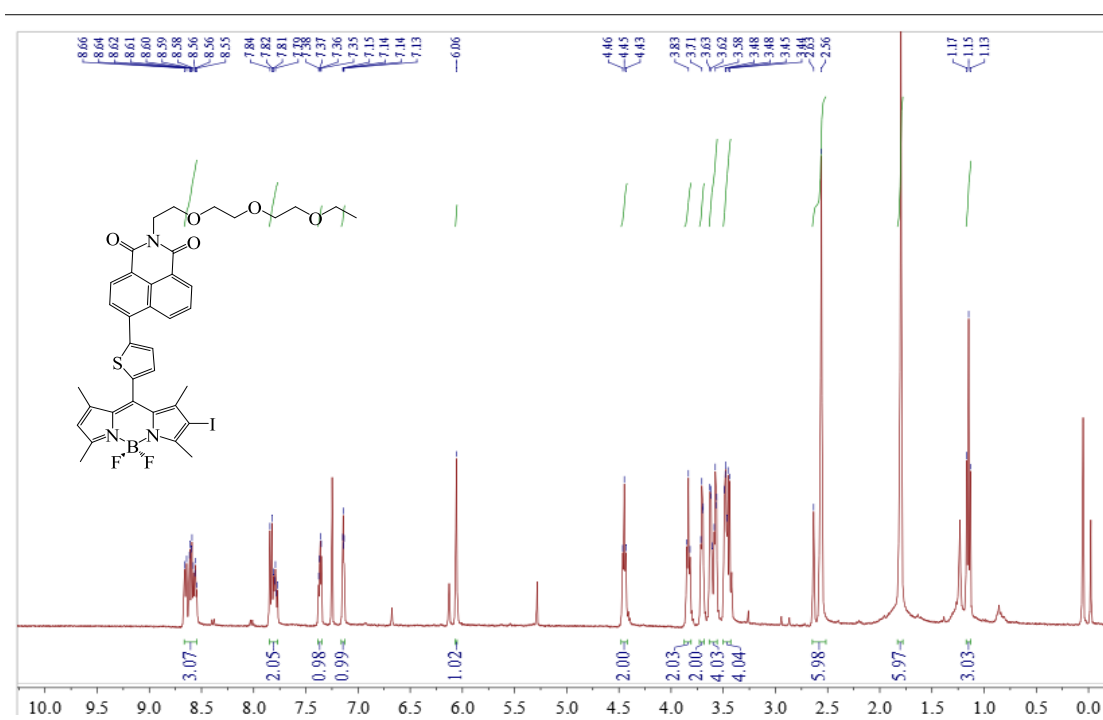

**Figure S11.**  $^1\text{H}$  NMR spectrum of compound 7b

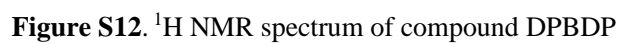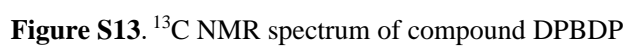

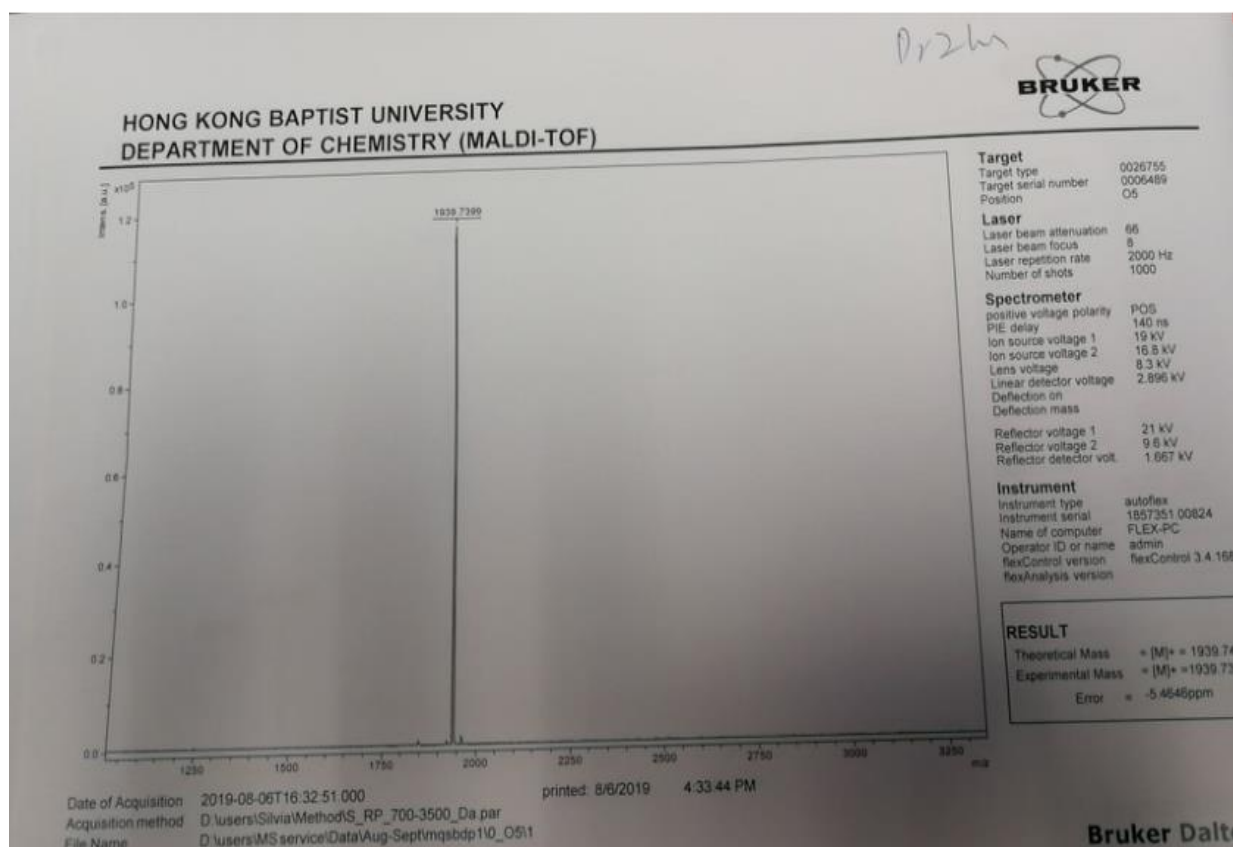

**Figure S14.** MALDI-TOF spectrum of compound DPBDP
